# Supplementary material for: Association of Age-Related Cataract With Skin Cancer in an Australian Population
Source: PubMed Central journal article supplement (PMC7405762; doi:10.1167/iovs.61.5.48), 2020-05-27
Supplement: iovs-61-5-48_s001.pdf [file iovs-61-5-48_s001.pdf]

## Supplementary material

Table S1. Medicare Benefits Schedule Codes used for determination of Skin Cancer Subtypes and Cataract Procedures

| Condition                                         | MBS item numbers                                                                                                                                                  | Additional Description                                                                                                               |
|---------------------------------------------------|-------------------------------------------------------------------------------------------------------------------------------------------------------------------|--------------------------------------------------------------------------------------------------------------------------------------|
| <b>Cataract</b>                                   | 42698, 42701, 42702, 42718                                                                                                                                        |                                                                                                                                      |
| <b>Skin Cancer: Keratinocyte</b>                  | 31255,31260,31265, 31270,31275,31280, 31285, 31290                                                                                                                | Surgical initial excision of a primary basal cell carcinoma (BCC) or squamous cell carcinoma (SCC), pathology confirmed              |
|                                                   | 30196,30197,30202, 30203, 30205                                                                                                                                   | Malignant neoplasm of skin by pathology or specialist opinion confirmed, and treatment with cryotherapy or serial curettage excision |
|                                                   | 31000, 31001, 31002                                                                                                                                               | Mohs micro surgery of skin tumour & histology exam, Histological proof of malignancy                                                 |
|                                                   | 31256,31261,31266, 31271,31276,31281, 31286, 31291, 31257,31262,31267, 31272,31277,31282, 31287, 31292, 31258,31263,31268, 31273,31278,31283, 31288, 31293, 31295 | Residual and recurrent BCC and SCC                                                                                                   |
| <b>Skin Cancer: Melanoma</b>                      | 31300,31305,31310, 31315,31320,31325, 31330, 31335                                                                                                                | Malignant melanoma and locally aggressive skin tumours, definitive surgical excision with an adequate surgical removal at that site  |
| <b>Skin Cancer: Pre-malignant solar keratosis</b> | 30192                                                                                                                                                             | Pre-malignant lesions, solar keratosis by ablative technique i.e. cryotherapy                                                        |
|                                                   | 31200                                                                                                                                                             | Removal of skin lesions (Pre-malignant lesions, including solar keratosis)                                                           |

MBS=Medicare Benefits Schedule. BCC=basal cell carcinoma. SCC=squamous cell carcinoma. Note: Medicare codes for skin cancer were restructured in November 2016. The codes in this table are the original codes used at the time of the procedure.
