# Supplementary material for: Association of Age-Related Cataract With Skin Cancer in an Australian Population
Source: PubMed Central journal article supplement (PMC7405762; doi:10.1167/iovs.61.5.48), 2020-05-27
Supplement: iovs-61-5-48_s002.pdf [file iovs-61-5-48_s002.pdf]

Table S2. Age stratified study sample by history of skin cancer, skin cancer subtypes and history of cataract

AGE ABOVE 80 YEARS

|                                       |               | History of cataract* |              |
|---------------------------------------|---------------|----------------------|--------------|
|                                       | Total Sample  | Yes<br>N (%)         | No<br>N (%)  |
| <b>Total</b>                          | 377,001       | 61,303               | 315,698      |
| Any history of skin cancer            | 117,761(31.2) | 20,940(34.2)         | 96,821(30.7) |
| Keratinocyte,<br>primary or recurrent | 87,686(23.3)  | 15,486(25.3)         | 72,200(22.9) |
| Melanoma                              | 4,360(1.2)    | 817(1.3)             | 3,543(1.1)   |
| Premalignant/<br>solar keratosis      | 58,975(15.6)  | 10,725(17.5)         | 48,250(15.3) |

AGE UNDER 80 YEARS

|                                       |              | History of cataract* |              |
|---------------------------------------|--------------|----------------------|--------------|
|                                       | Total Sample | Yes<br>N (%)         | No<br>N (%)  |
| <b>Total</b>                          | 222,315      | 25,794               | 196,521      |
| Any history of skin cancer            | 52,490(23.6) | 7,135(27.7)          | 45,355(23.1) |
| Keratinocyte,<br>primary or recurrent | 36,554(16.4) | 5,011(19.4)          | 31,543(16.1) |
| Melanoma                              | 2,157(1.0)   | 310(1.2)             | 1,847(0.9)   |
| Premalignant/<br>solar keratosis      | 28,448(12.8) | 4,005(15.5)          | 24,443(12.4) |

\* There is overlap between the groups due to participants having multiple skin cancer treatment procedures. There were 3,779 individuals aged above 80 years and 1,582 under 80 years who were diagnosed with skin cancer as listed in the aged care eligibility assessment but did not have a procedure for treatment of skin cancer; these individuals were not classified by skin cancer subtype.
