# Supplementary material for: Association of Age-Related Cataract With Skin Cancer in an Australian Population
Source: PubMed Central journal article supplement (PMC7405762; doi:10.1167/iovs.61.5.48), 2020-05-27
Supplement: iovs-61-5-48_s003.pdf [file iovs-61-5-48_s003.pdf]

Table S3. Association of history of skin cancer and skin cancer subtypes with history of cataract stratified by age

AGE ABOVE 80 YEARS

| Outcome variable                                | Crude OR (95%CI) | Adjusted OR (95%CI) | P value |
|-------------------------------------------------|------------------|---------------------|---------|
| Any history of skin cancer <sup>a</sup>         | 1.17(1.15,1.19)  | 1.17(1.15,1.20)     | <0.001  |
| Keratinocyte, primary or recurrent <sup>b</sup> | 1.14(1.12,1.16)  | 1.14(1.12,1.17)     | <0.001  |
| Melanoma <sup>c</sup>                           | 1.19(1.10,1.29)  | 1.17(1.09,1.27)     | <0.001  |
| Premalignant/solar keratoses <sup>d</sup>       | 1.18(1.15,1.20)  | 1.16(1.14,1.19)     | <0.001  |

OR=Odds ratio. CI=Confidence intervals.

<sup>a</sup>Model 1: N=369,522, 2.0% missing data. Model adjusted for sex, age, country of birth, state of residence, Indigenous status, non-skin cancers, diabetes, glaucoma, and co-morbidity burden.

<sup>b</sup>Model 2: N=369,522, 2.0% missing data. Model adjustment for covariates same as 1.

<sup>c</sup>Model 3: N=369,522, 2.0% missing data. Model adjustment for covariates same as 1.

<sup>d</sup>Model 4: N=369,522, 2.0% missing data. Model adjustment for covariates same as 1.

AGE UNDER 80 YEARS

| Outcome variable                                | Crude OR (95%CI) | Adjusted OR (95%CI) | P value |
|-------------------------------------------------|------------------|---------------------|---------|
| Any history of skin cancer <sup>a</sup>         | 1.28(1.24,1.31)  | 1.16(1.12,1.20)     | <0.001  |
| Keratinocyte, primary or recurrent <sup>b</sup> | 1.26(1.22,1.30)  | 1.14(1.10,1.18)     | <0.001  |
| Melanoma <sup>c</sup>                           | 1.28(1.14,1.45)  | 1.21(1.07,1.37)     | 0.003   |
| Premalignant/solar keratoses <sup>d</sup>       | 1.29(1.25,1.34)  | 1.18(1.14,1.12)     | <0.001  |

OR=Odds ratio. CI=Confidence intervals.

<sup>a</sup>Model 1: N=215,831, 2.9% missing data. Model adjusted for sex, age, country of birth, state of residence, Indigenous status, non-skin cancers, diabetes, glaucoma, and co-morbidity burden.

<sup>b</sup>Model 2: N=215,831, 2.9% missing data. Model adjustment for covariates same as 1.

<sup>c</sup>Model 3: N=215,831, 2.9% missing data. Model adjustment for covariates same as 1.

<sup>d</sup>Model 4: N=215,831, 2.9% missing data. Model adjustment for covariates same as 1.
